# Supplementary material for: Deficiency in Androgen Receptor Aggravates the Depressive-Like Behaviors in Chronic Mild Stress Model of Depression
Source: MDPI journal article supplement (doi:10.3390/cells8091021), 2019-09-02
Supplement: s1 [file s1]

|                          | MDD patients<br>n = 21 | Health controls<br>n = 15 | P value |
|--------------------------|------------------------|---------------------------|---------|
| Age (year)               | 44.86 ± 8.66           | 39.80 ± 15.72             | 0.170   |
| BMI (kg/m <sup>2</sup> ) | 22.63 ± 3.76           | 23.71 ± 3.35              | 0.391   |
| HAMD-17<br>score         | 28.55                  | -                         | -       |
| AR mRNA<br>(-Delta CT)   | -11.69 ± 1.37          | -10.81 ± 1.04             | 0.042*  |

**Supplementary Table S1. AR mRNA expression level is lower in PBMCs from male patients with major depressive disorder (MDD) compared with male healthy controls. BMI=body mass Index, HAMD=the 17-item Hamilton Depression Rating Scale.**

**\* Mann-Whitney U test**
